# Supplementary material for: Supplementing a Phytogenic Feed Additive Modulates the Risk of Subacute Rumen Acidosis, Rumen Fermentation and Systemic Inflammation in Cattle Fed Acidogenic Diets
Source: MDPI journal article supplement (doi:10.3390/ani12091201), 2022-05-06
Supplement: s1 [file s1]

**Table S1.** Effect of supplementation with a phytogenic feed additive based on L-menthol, thymol, eugenol, mint oil (*Mentha arvensis*) and cloves powder (*Syzygium aromaticum*) on reticular short chain fatty acid profile, ammonia and lactate in cows consuming a forage diet or a high concentrate diet <sup>1</sup>.

|                                | Forage Diet<br>Week 0 |       | High Concentrate<br>Week 1 |       | High Concentrate<br>Week 2 |                    | High Concentrate<br>Week 3 |                    | High Concentrate<br>Week 4 |       | <i>p</i> -Values <sup>3</sup> |       |      |       |
|--------------------------------|-----------------------|-------|----------------------------|-------|----------------------------|--------------------|----------------------------|--------------------|----------------------------|-------|-------------------------------|-------|------|-------|
| Item                           | CON                   | PHY   | CON                        | PHY   | CON                        | PHY                | CON                        | PHY                | CON                        | PHY   | SEM <sup>2</sup>              | D     | T    | I     |
| Total SCFA concentration, mM   | 74.1                  | 77.2  | 105                        | 96.2  | 107                        | 101                | 109 <sup>x</sup>           | 94.0 <sup>y</sup>  | 108                        | 109   | 3.36                          | <0.01 | 0.04 | 0.09  |
| % of total SCFA                |                       |       |                            |       |                            |                    |                            |                    |                            |       |                               |       |      |       |
| Acetate                        | 66.4                  | 66.6  | 58.1                       | 57.1  | 52.5 <sup>b</sup>          | 55.8 <sup>a</sup>  | 58.3                       | 58.0               | 58.0                       | 58.4  | 0.75                          | <0.01 | 0.56 | <0.01 |
| Propionate                     | 16.2                  | 15.8  | 20.8                       | 21.8  | 29.6 <sup>a</sup>          | 23.8 <sup>b</sup>  | 23.5                       | 22.8               | 23.5                       | 23.2  | 0.71                          | <0.01 | 0.12 | <0.01 |
| Butyrate                       | 10.4                  | 10.6  | 15.6                       | 16.1  | 12.0 <sup>b</sup>          | 14.0 <sup>a</sup>  | 12.7                       | 13.0               | 12.7                       | 12.7  | 0.53                          | <0.01 | 0.21 | 0.06  |
| Isobutyrate                    | 1.89                  | 1.94  | 0.95                       | 1.03  | 0.88                       | 1.08               | 1.15                       | 1.23               | 1.14                       | 1.07  | 0.06                          | <0.01 | 0.40 | <0.01 |
| Isovalerate                    | 2.40                  | 2.53  | 1.40                       | 1.36  | 1.54 <sup>b</sup>          | 1.98 <sup>a</sup>  | 1.66 <sup>y</sup>          | 1.97 <sup>x</sup>  | 1.62                       | 1.57  | 0.11                          | <0.01 | 0.31 | <0.01 |
| Valerate                       | 1.72                  | 1.75  | 2.09                       | 2.14  | 2.43                       | 2.36               | 2.03                       | 2.04               | 2.11                       | 2.28  | 0.07                          | <0.01 | 0.55 | 0.63  |
| Ratio of acetate to propionate | 4.07                  | 4.21  | 2.78                       | 2.62  | 1.76 <sup>b</sup>          | 2.33 <sup>a</sup>  | 2.47                       | 2.53               | 2.45                       | 2.51  | 0.10                          | <0.01 | 0.19 | <0.01 |
| Ammonia, mg/dL                 | 19.11                 | 20.01 | 12.52                      | 13.91 | 10.67 <sup>b</sup>         | 16.30 <sup>a</sup> | 19.57 <sup>a</sup>         | 15.48 <sup>b</sup> | 16.03                      | 18.45 | 1.33                          | <0.01 | 0.15 | <0.01 |
| Lactate <sup>4</sup>           |                       |       |                            |       |                            |                    |                            |                    |                            |       |                               |       |      |       |
| D-lactate, mM                  | 0.186                 | 0.195 | 0.640                      | 0.650 | 0.633                      | 0.723              | 0.872                      | 0.893              | 0.699                      | 0.795 | 0.0015                        | <0.01 | 0.25 | <0.05 |
| L-lactate, mM                  | 0.123                 | 0.099 | 0.313                      | 0.310 | 0.249                      | 0.289              | 0.290                      | 0.406              | 0.348                      | 0.390 | 0.0007                        | <0.01 | 0.27 | <0.01 |
| Total lactate, mM              | 0.330                 | 0.311 | 0.972                      | 0.967 | 0.863                      | 1.020              | 1.194                      | 1.309              | 1.102                      | 1.219 | 0.0020                        | <0.01 | 0.27 | <0.01 |

<sup>1</sup> CON: A control diet containing no phytogenic product; PHY: supplementation with a phytogenic feed additive based on L-menthol, thymol, eugenol, mint oil (*Mentha arvensis*) and cloves powder (*Syzygium aromaticum*); <sup>2</sup>The largest standard error of the mean; <sup>3</sup>*p*-Values for the effect of diet (D), phytogenic treatment (T) and the diet × week × treatment interaction (I); <sup>4</sup>Values were transformed using the root square function after checking for normal distribution, and were transformed back after the analysis; <sup>a,b</sup> Means with different superscripts indicate a significant difference ( $p < 0.05$ ) between CON and PHY; <sup>x,y</sup> Means with different superscripts indicate a tendency for significant difference ( $0.05 < p \leq 0.10$ ) between CON and PHY.

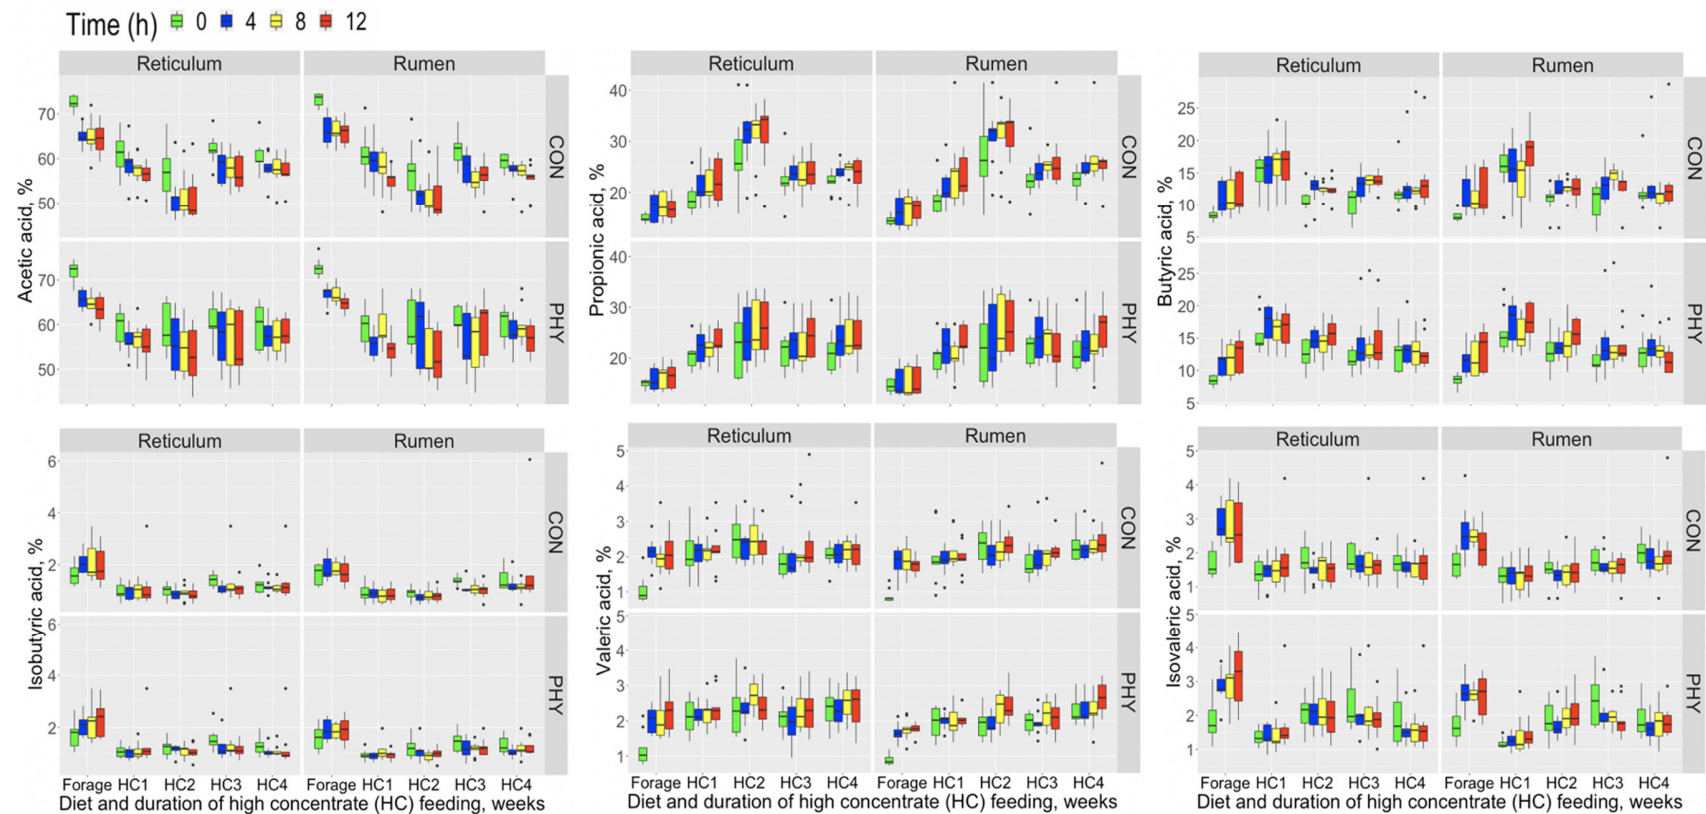

**Figure S1.** Boxplots illustrating the fermentation pattern and short chain fatty acid profile in the reticulum and rumen with time post-feeding according to diet and duration of high concentrate feeding in Holstein cows without supplementation (CON) or supplemented with a phytogenic feed additive (PHY) based on L-menthol, thymol, eugenol, mint oil (*Mentha arvensis*) and cloves powder (*Syzygium aromaticum*).

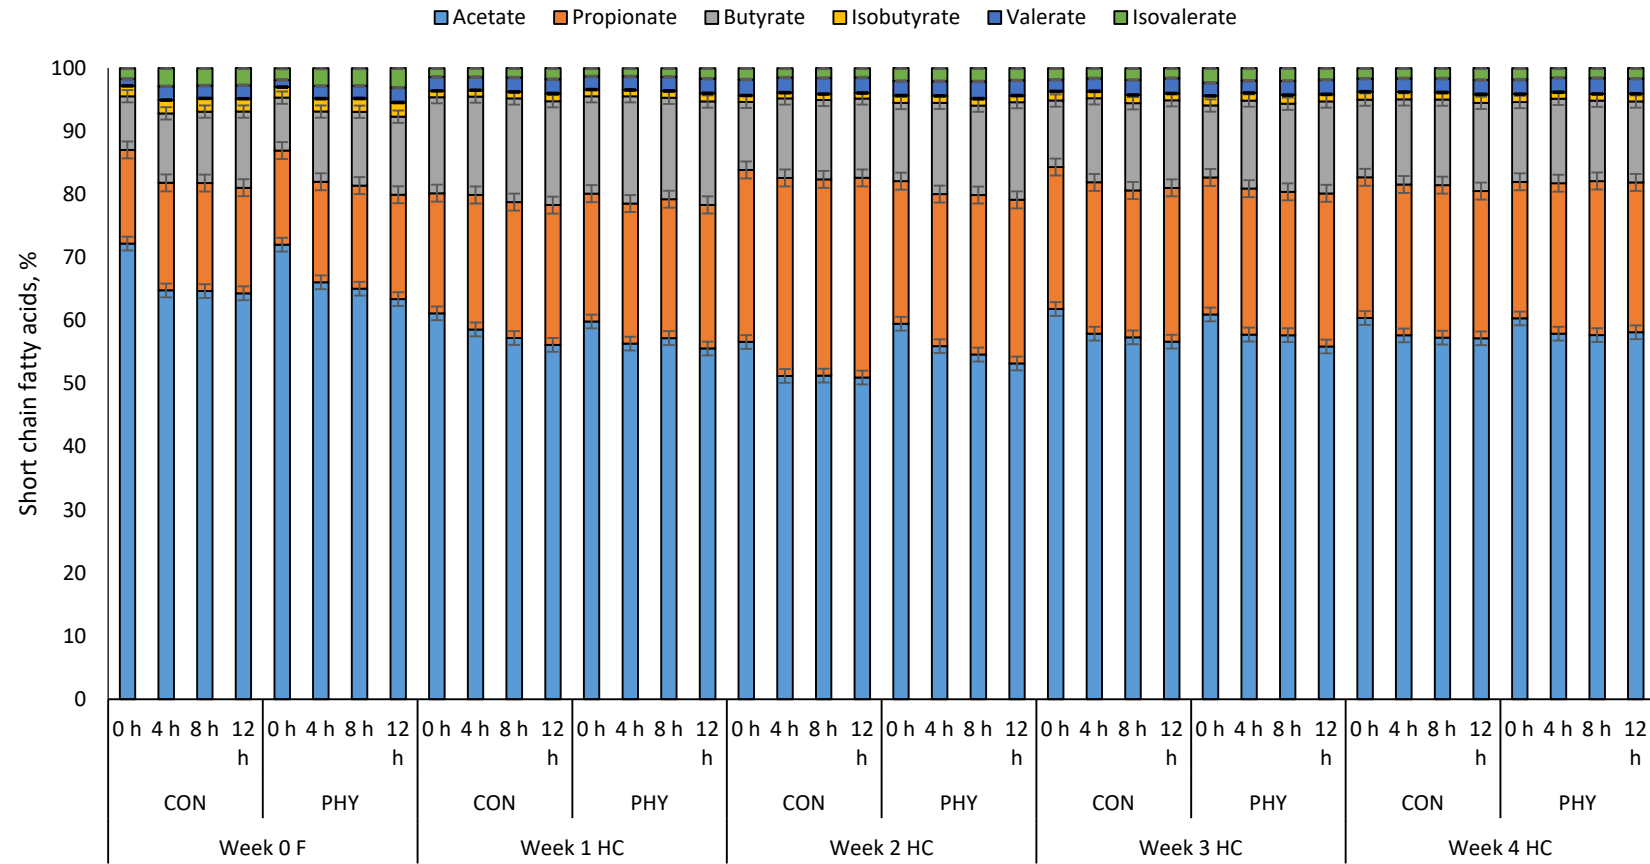

**Figure S2.** Variation of reticular short chain fatty acid fermentation from 0 to 12 h post-feeding in cows fed either all-forage (F) or a high concentrate (HC), without supplementation (CON) or supplemented with a phytogenic feed additive (PHY) based on L-menthol, thymol, eugenol, mint oil (*Mentha arvensis*) and cloves powder (*Syzygium aromaticum*). *p*-Values: Acetate, Time < 0.01, Trt = 0.54, Diet < 0.01, Time×Trt×Diet×Week < 0.01; Propionate, Time < 0.01, Trt = 0.17, Diet < 0.01, Time×Trt×Diet×Week < 0.01; Butyrate, Time < 0.01, Trt = 0.50, Diet < 0.01, Time×Trt×Diet×Week < 0.01; Isobutyrate, Time = 0.42, Trt = 0.67, Diet < 0.01, Time×Trt×Diet×Week < 0.01; Valerate, Time < 0.01, Trt = 0.64, Diet < 0.01, Time×Trt×Diet×Week < 0.01; Isovalerate, Time < 0.05, Trt = 0.29, Diet < 0.01, Time×Trt×Diet×Week < 0.01.

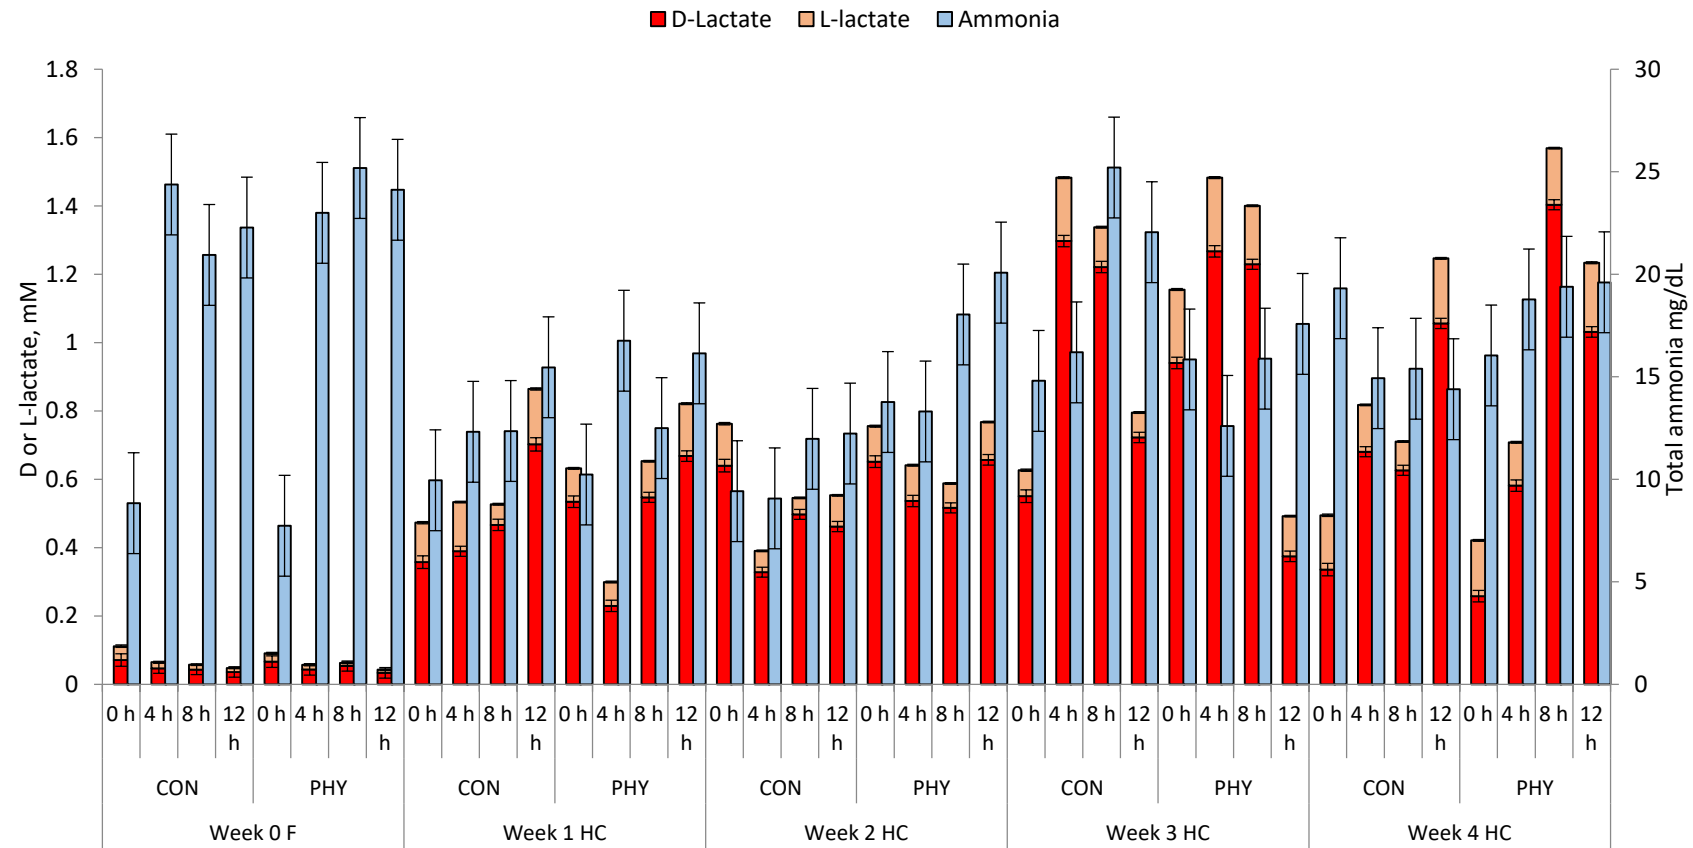

**Figure S3.** Variation of reticular D-lactate, L-lactate (mM), and total ammonia concentration (mg/dL) from 0 to 12 h post-feeding in cows fed either all-forage (F) or a high concentrate (HC), without supplementation (CON) or supplemented with a phytogenic feed additive (PHY) based on L-menthol, thymol, eugenol, mint oil (*Mentha arvensis*) and cloves powder (*Syzygium aromaticum*). *p*-Values: D-lactate, Time = 0.25, Trt = 0.48, Diet < 0.01, Time×Trt×Diet×Week < 0.01; L-lactate, Time = 0.16, Trt = 0.38, Diet < 0.01, Time×Trt×Diet×Week < 0.05; Total ammonia, Time < 0.01, Trt = 0.15, Diet < 0.01, Time×Trt×Diet×Week < 0.01.
